# Supplementary material for: ω-Unsaturated methacrylate macromonomers as reactive polymeric stabilizers in mini-emulsion polymerization
Source: Royal Society of Chemistry journal article supplement (doi:10.1039/d1py01664d), 2022-01-01
Supplement: d1py01664d1.pdf [file d1py01664d1.pdf]

## Electronic supplementary information

### $\omega$ -Unsaturated methacrylate macromonomers as reactive polymeric stabilizers in mini-emulsion polymerization

Joshua R. Booth,<sup>a</sup> Joshua D. Davies,<sup>a</sup> and Stefan A. F. Bon\*<sup>a</sup>

<sup>a</sup>Department of Chemistry, The University of Warwick, Coventry, CV4 7AL, UK. <https://bonlab.info>

\*Email: s.bon@warwick.ac.uk

**Table S1** Recipes for the mini-emulsion polymerization series of benzyl methacrylate and hexadecane as hydrophobe with poly(*n*-butyl methacrylate-*block*-[methacrylic acid-*co*-methyl methacrylate]) as stabilizer.

|                        | Reaction code |          |        |          |         |
|------------------------|---------------|----------|--------|----------|---------|
|                        | 1.25% w/w     | 2.5% w/w | 5% w/w | 7.5% w/w | 10% w/w |
| Macromonomer/ g        | 0.1007        | 0.2008   | 0.3995 | 0.6008   | 0.7997  |
| Water/ g               | 32.00         | 32.0     | 32.0   | 32.0     | 32.0    |
| Benzyl Methacrylate/ g | 7.6010        | 7.6025   | 7.6061 | 7.5952   | 7.5980  |
| Hexadecane/ g          | 0.4313        | 0.4170   | 0.4028 | 0.4166   | 0.4083  |
| AIBN/ g                | 0.0106        | 0.0119   | 0.0113 | 0.0108   | 0.0131  |

**Table S2** Parameters used to calculate the surface free energy for poly(benzyl methacrylate) films.

| Substance       | <sup>a</sup> Contact angle/ ° | Surface tension/<br>mN.m <sup>-1</sup> | Polar part/<br>mN.m <sup>-1</sup> | Dispersive part/<br>mN.m <sup>-1</sup> |
|-----------------|-------------------------------|----------------------------------------|-----------------------------------|----------------------------------------|
| Ethylene glycol | 60.25 ± 0.49                  | 47.7                                   | 21.3                              | 26.4                                   |
| Water           | 85.12 ± 1.23                  | 72.8                                   | 51                                | 21.8                                   |
| Hexadecane      | 3.40                          | 27.6                                   | 0                                 | 27.6                                   |

<sup>a</sup> Contact angle was measured by sessile drop technique using Young-Laplace fitting method.

**Table S3** Small-angle X-ray scattering (SAXS) parameters used for the fitting of sphere form factor and Hayter-Penfold Rescaled Mean Spherical Approximation (RMSA) structure factor to macromonomer micelles.

|                                         |                       |
|-----------------------------------------|-----------------------|
| Scale                                   | 1                     |
| Background                              | $6.14 \times 10^{-3}$ |
| SLD sample/ $10^{-6} \text{ \AA}^{-2}$  | 9.69                  |
| SLD solvent/ $10^{-6} \text{ \AA}^{-2}$ | 9.43                  |
| Volume fraction                         | $3.63 \times 10^{-2}$ |
| Charge/ e                               | 10                    |
| Temperature/ K                          | 303                   |
| Salt concentration/ M                   | 0.01                  |
| Dielectric constat                      | 76.546                |
| Distribution of radius (log)            | 0.37                  |
| <b>Sphere radius/ nm</b>                | <b>13.255</b>         |
| <b>Chi<sup>2</sup>/Npts</b>             | <b>1.719</b>          |

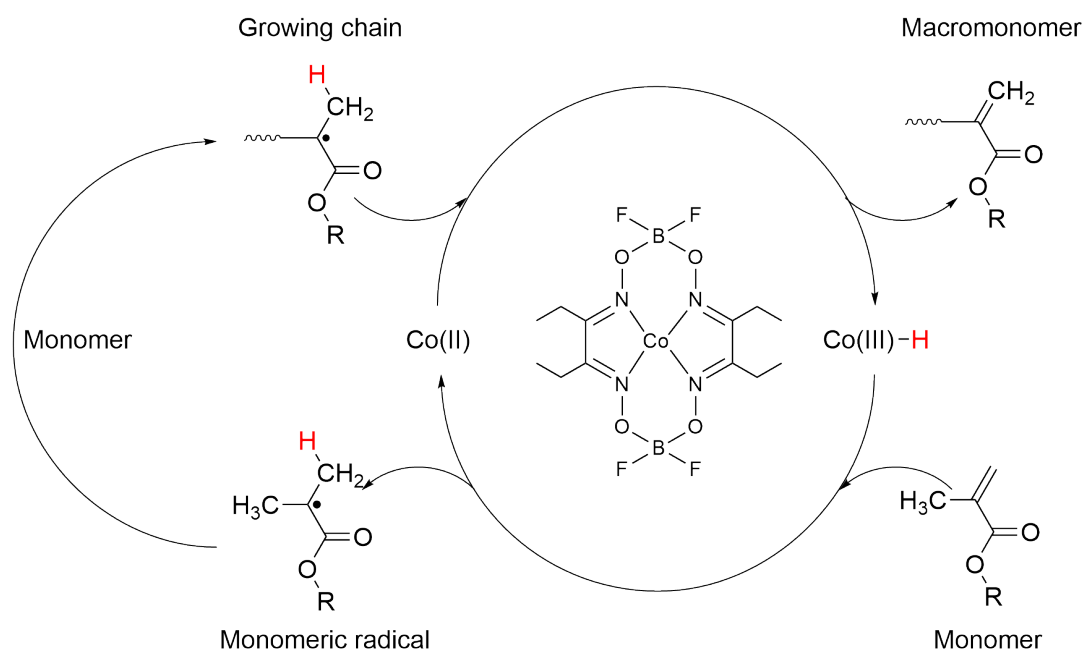

**Scheme S1** Synthesis of  $\omega$ -unsaturated methacrylate macromonomers by catalytic chain transfer polymerisation (CCTP) with bis[(difluoroboryl)diethylglyoximate]cobalt(II) (CoEtBF) as catalyst.

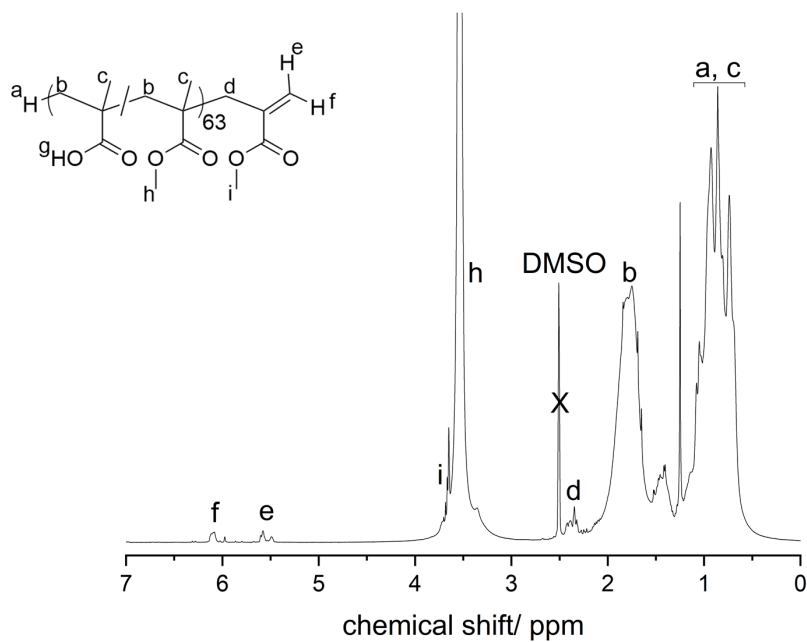

**Figure S1**  $^1\text{H}$  NMR spectrum for poly(methacrylic acid-co-methyl methacrylate).

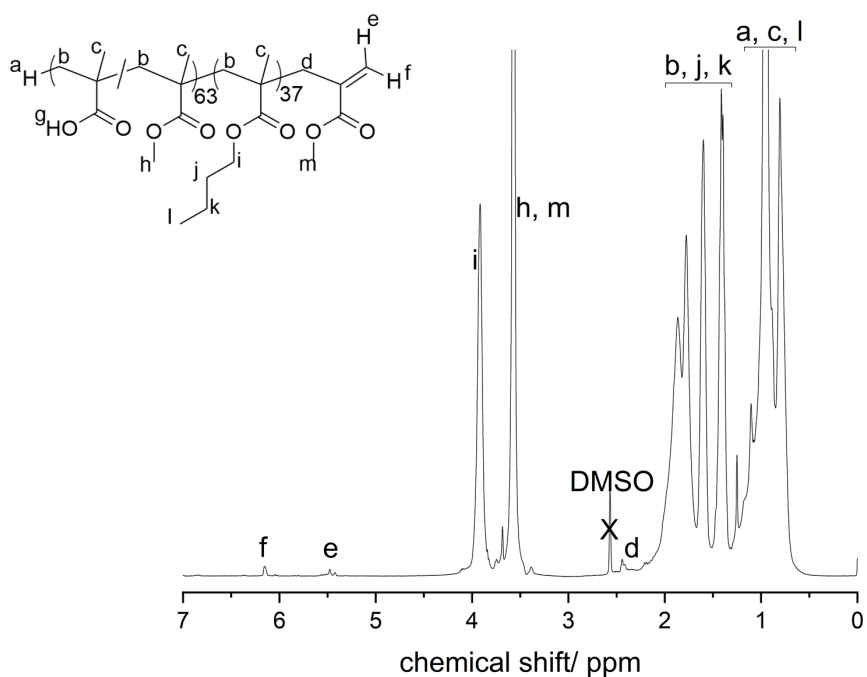

**Figure S2**  $^1\text{H}$  NMR spectrum for poly(*n*-butyl methacrylate-*block*-[methacrylic acid-*co*-methyl methacrylate]).

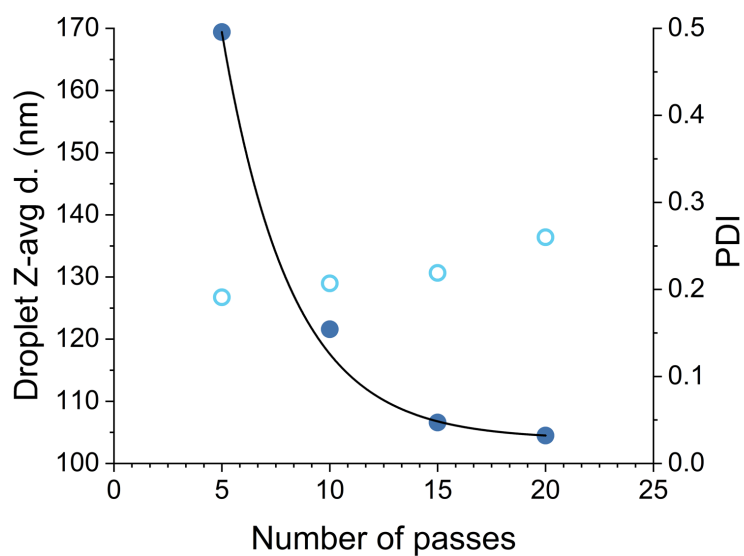

**Figure S3** Z-average droplet diameter and PDI measure by DLS of SDS stabilized hexadecane mini-emulsion after 5, 10, 15 and 20 passes through a high-pressure homogenizer with value pressure 12.5 kPsi.

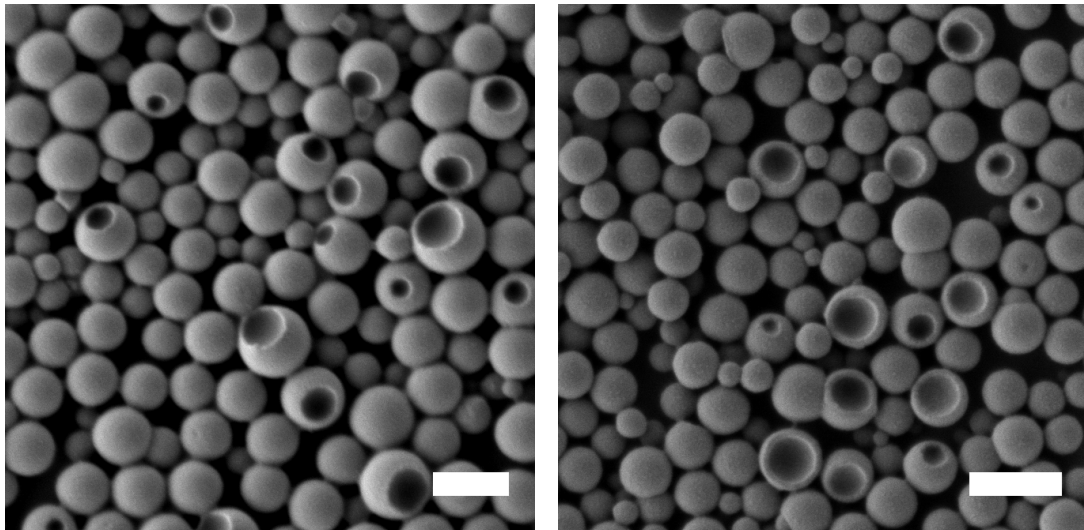

**Figure S4** High magnification SEM images of reactions MM-1.25% (left) and MM-2.5% (right) showing a range of dimple sizes. Both scale bars are 250 nm.

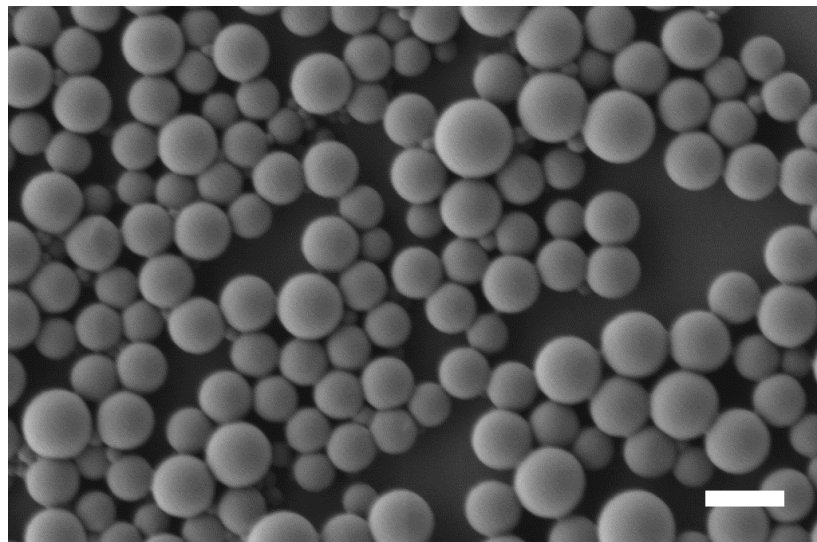

**Figure S5** Scanning electron microscopy image of poly(benzyl methacrylate) particles with 5% w/w octadecyl methacrylate as hydrophobe and 1.25 wt% macromonomer stabilizer. Scale bar is 300nm.

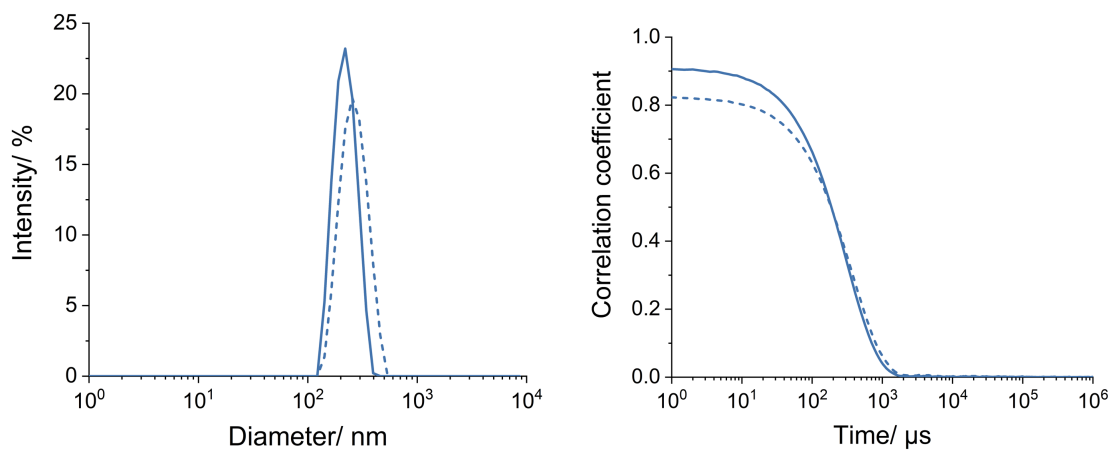

**Figure S6** DLS data for a mini-emulsion benzyl methacrylate with 5% w/w octadecyl methacrylate as hydrophobe and 1.25 wt% macromonomer stabilizer. Intensity weight size distributions (left) and correlograms (right) are shown. Mini-emulsion droplet data shown as dashed lines, final particle data shown as solid lines.

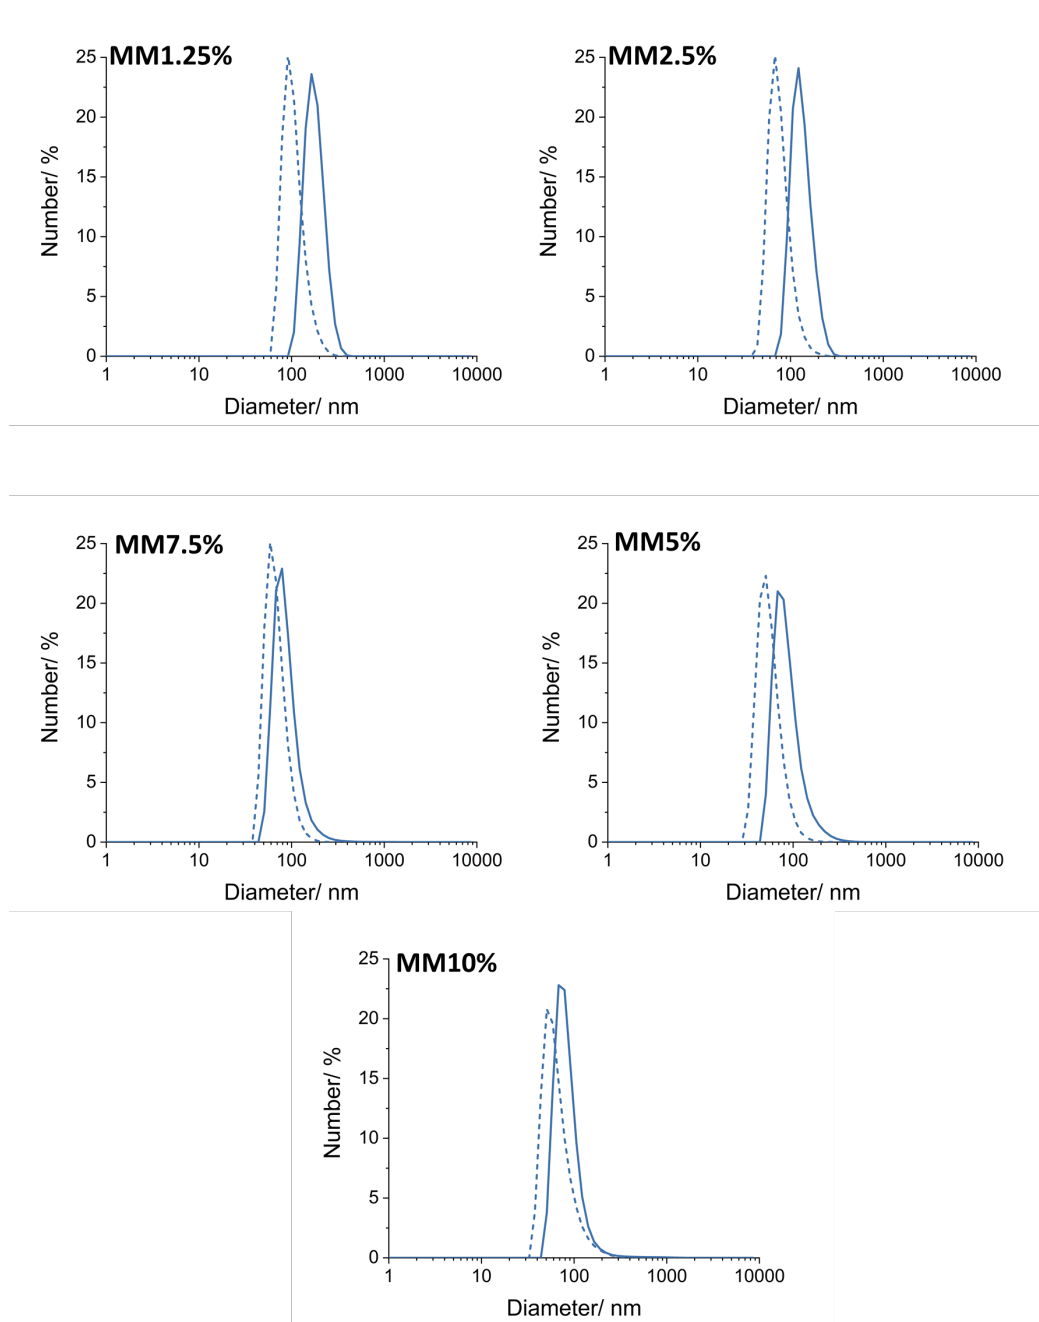

**Figure S7** Number weighted size distributions of poly(benzyl methacrylate) mini-emulsion monomer droplets and particles at full conversion. Droplet distributions are shown in dashed lines, particle distributions are shown as solid lines.

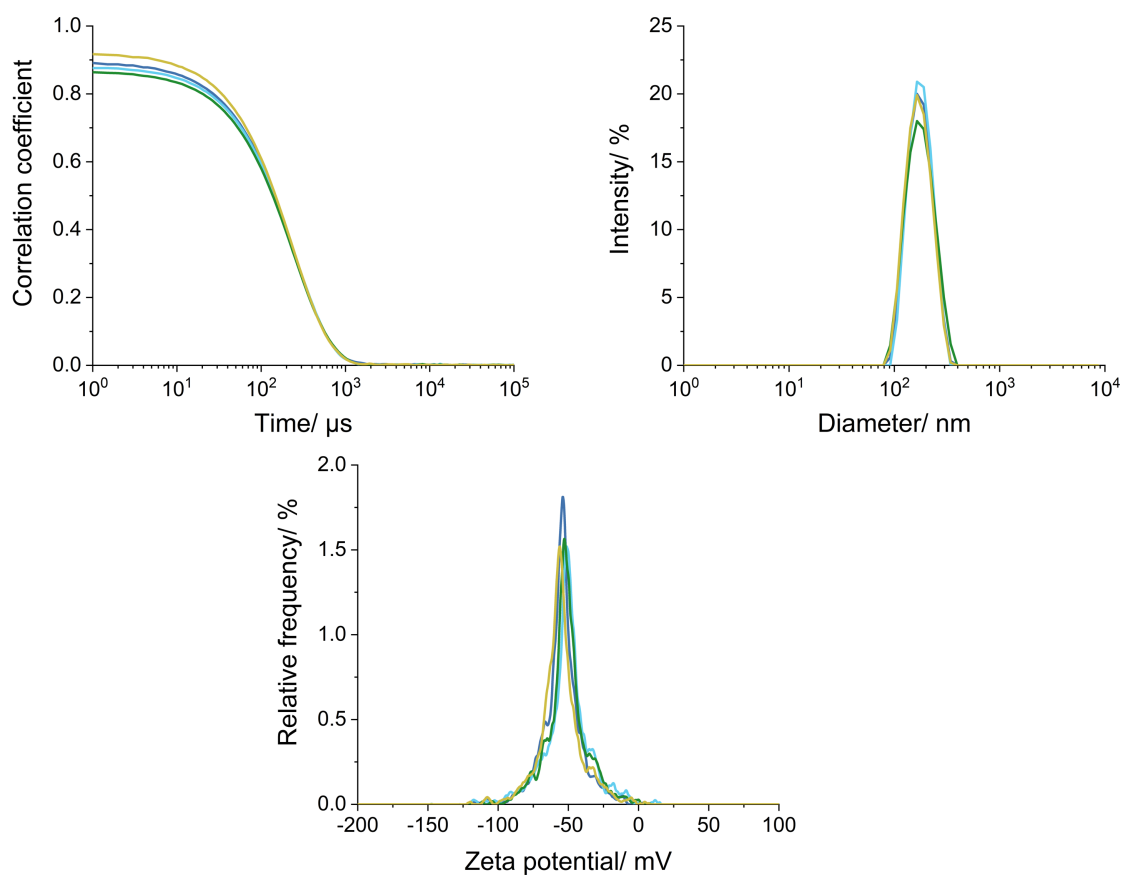

**Figure S8** (Top left) DLS analysis producing correlograms and (top right) particle size distributions of poly(benzyl methacrylate) particles after 0 days (dark blue), 7 days (light blue), 14 days (green) and 21 days (yellow) dialysis against deionized water ( $\geq 15 \text{ M}\Omega$ ). (Bottom) Zeta potential spectrum of poly(benzyl methacrylate) particles after 0 days (dark blue), 7 days (light blue), 14 days (green) and 21 days (yellow) dialysis against deionized water ( $\geq 15 \text{ M}\Omega$ ).



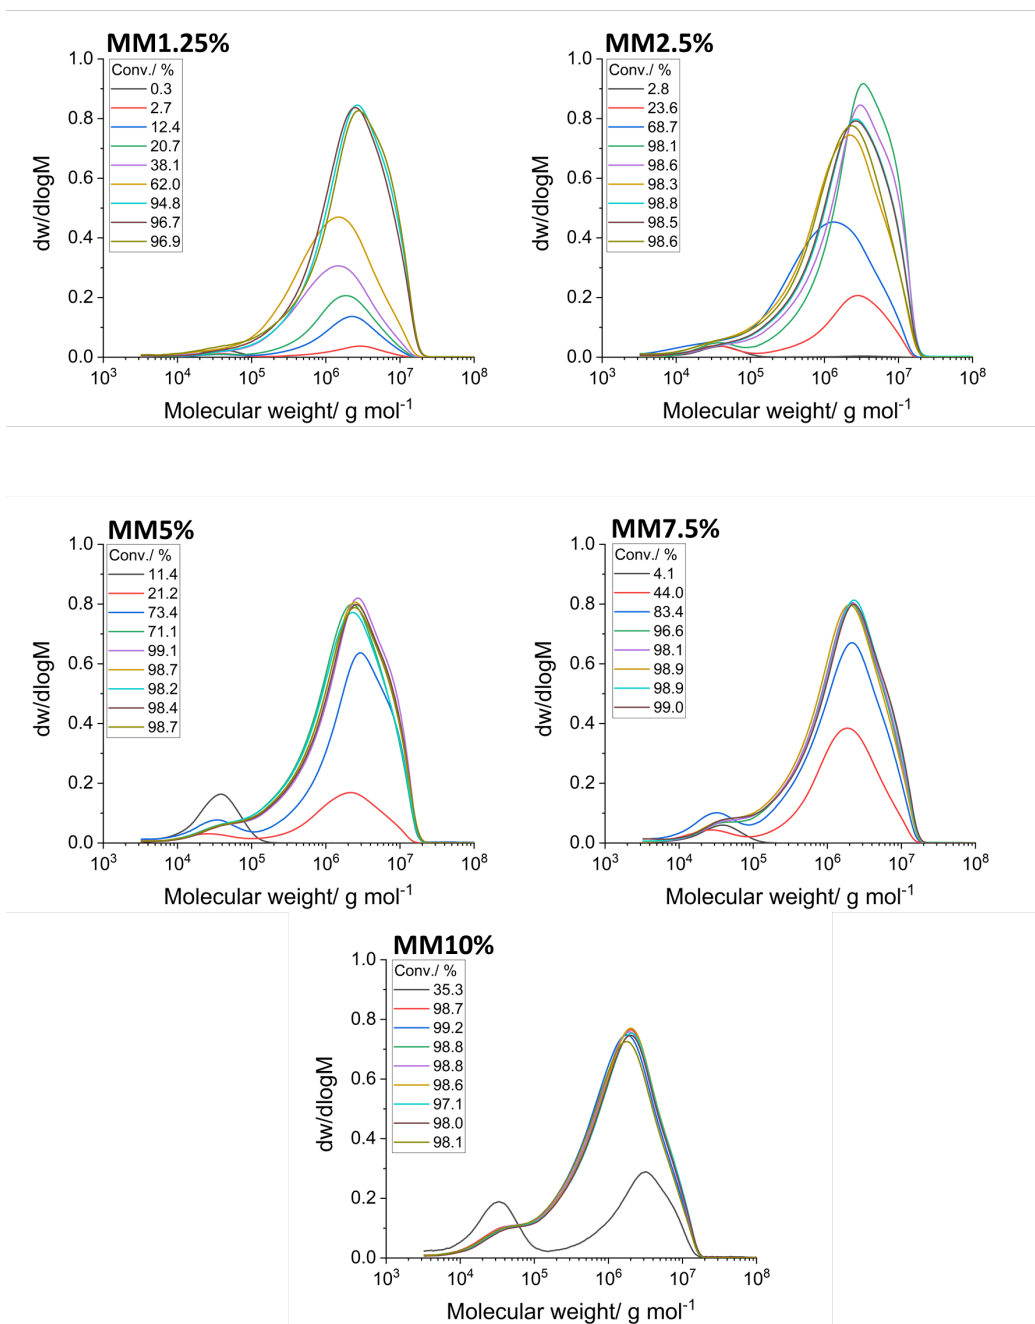

**Figure S9** Molecular weight distribution (GPC, THF) for macromonomer stabilized benzyl methacrylate mini-emulsion polymerizations. Percentage cumulative monomer of the reaction when each sample was taken is show in the inset legends. The distributions have been normalised to cumulative monomer conversion.
